# Bumblebee worker castes show differences in allele-specific DNA methylation and allele-specific expression.

Marshall, H.<sup>1\*</sup>, Jones, A.R.C.<sup>1</sup>, Lonsdale, Z.N.<sup>1</sup> and Mallon, E.B.<sup>1</sup>

<sup>1</sup>Department of Genetics and Genome Biology, The University of Leicester, Leicester, UK.

\* Author for correspondence: Hollie Marshall, Department of Genetics and Genome Biology, University of Leicester, Leicester, UK. Tel: +(0)447527 719009. Email: [hollie\\_marshall@hotmail.co.uk](mailto:hollie_marshall@hotmail.co.uk).

Friday 7<sup>th</sup> February, 2020

1 **Article Type:** Research Article.

2 **Abstract word count:** 226.

3 **Keywords**— genomic imprinting, bumblebee, Hymenoptera, parent-of-origin.

## Allele-specific methylation and expression in bumblebees.

---

4

### Abstract

5

6

7

8

9

10

11

12

13

14

15

16

17

18

19

20

21

22

23

*Allele-specific expression is when one allele of a gene shows higher levels of expression compared to the other allele, in a diploid organism. Genomic imprinting is an extreme example of this, where some genes exhibit allele-specific expression in a parent-of-origin manner. Recent work has identified potentially imprinted genes in species of Hymenoptera. However, the molecular mechanism which drives this allelic expression bias remains unknown. In mammals DNA methylation is often associated with imprinted genes. DNA methylation systems have been described in species of Hymenoptera, providing a candidate imprinting mechanism. Using previously generated RNA-Seq and whole genome bisulfite sequencing from reproductive and sterile bumblebee (*Bombus terrestris*) workers we have identified genome-wide allele-specific expression and allele-specific DNA methylation. The majority of genes displaying allele-specific expression are common between reproductive castes and the proportion of allele-specific expression bias generally varies between colonies. We have also identified genome-wide allele-specific DNA methylation patterns in both castes. There is no significant overlap between genes showing allele-specific expression and allele-specific methylation. These results indicate that DNA methylation does not directly drive genome-wide allele-specific expression in this species. Only a small number of the genes identified may be 'imprinted' and it may be these genes which are associated with allele-specific DNA methylation. Future work utilising reciprocal crosses to identify parent-of-origin DNA methylation will further clarify the role of DNA methylation in parent-of-origin allele-specific expression.*

## 24 Introduction

25 Allele-specific expression is when one allele of a gene shows higher levels of expression compared  
26 to the other allele in a diploid organism. It has been associated with genomic mechanisms such as  
27 X-chromosome inactivation and genomic imprinting, i.e. parent-of-origin allele-specific expression  
28 (Knight, 2004). It has been predicted that social insects should display imprinted genes (Queller,  
29 2003) based on assumptions of the kinship theory (Haig, 2000). Recent research has identified  
30 parent-of-origin allele-specific expression in honeybees and bumblebees (Galbraith *et al.*, 2016;  
31 Kocher *et al.*, 2015; Marshall *et al.*, 2020), with one study identifying greater paternal-allele  
32 (patrigene) expression bias in reproductive honeybee workers compared to sterile workers, as  
33 predicted by the kinship theory (Galbraith *et al.*, 2016). However, the mechanism by which these  
34 genes exhibit this expression bias remains unknown.

35 In mammals and angiosperm plants imprinted genes are often associated with allele-specific  
36 DNA methylation (Barlow and Bartolomei, 2014). Many social insects have functional DNA  
37 methylation systems, including the eusocial honeybee (Bewick *et al.*, 2016; Lyko *et al.*, 2010) and  
38 primitively eusocial bumblebee, *Bombus terrestris* (Sadd *et al.*, 2015). However, the function of  
39 DNA methylation in insects remains debated (Glastad *et al.*, 2018).

40 Various studies have found an association between methylation and gene expression (Glastad  
41 *et al.*, 2014; Bonasio *et al.*, 2012; Patalano *et al.*, 2015; Marshall *et al.*, 2019), and alternative splicing  
42 (Lyko *et al.*, 2010; Glastad *et al.*, 2016) in social insects. However, this is not uniform across all  
43 species, see Standage *et al.* (2016). Additionally, allele-specific expression has been associated with  
44 allele-specific methylation in two ant species, *Camponotus floridanus* and *Harpegnathos saltator*  
45 (Bonasio *et al.*, 2012). Another study did not find any relationship between allele-specific expression  
46 and methylation in a hybrid cross of two non-social wasp species, *Nasonia vitripennis* and *Nasonia*  
47 *giraulti* (Wang *et al.*, 2016).

48 Bumblebees provide an ideal system to further investigate the relationship between allele-specific

## Allele-specific methylation and expression in bumblebees.

---

49 methylation and allele-specific expression, specifically with a view of elucidating potential  
50 mechanisms involved in genomic imprinting in social insects. Using a candidate gene approach,  
51 previous research identified allele-specific expression in a gene (ecdysone 20-monooxygenase-like)  
52 related to worker reproductive behaviour in *B. terrestris* (Amarasinghe *et al.*, 2015). Additional  
53 research has since used RNA-seq data to identify >500 loci showing allele-specific expression  
54 throughout the *B. terrestris* genome (Lonsdale *et al.*, 2017). This same study also identified 19 genes  
55 displaying allele-specific expression and allele-specific methylation, although this was in a single  
56 individual (Lonsdale *et al.*, 2017).

57 It is predicted that imprinted genes in *B. terrestris* will specifically have a role regarding  
58 worker reproductive behaviour (Queller, 2003). Methylation has been directly associated with  
59 reproductive behaviour in *B. terrestris* (Amarasinghe *et al.*, 2014) and recent research has identified  
60 differentially methylated genes between reproductive and sterile worker castes (Marshall *et al.*, 2019)

61 In order to identify the genome-wide relationship between allele-specific expression and  
62 allele-specific methylation in *B. terrestris* we have taken advantage of a previously generated data  
63 set. These data consist of whole genome bisulfite sequencing and RNA-seq from reproductive  
64 and sterile workers, spanning three genetically distinct colonies. We hypothesise that if genomic  
65 imprinting plays a role in worker reproductive behaviour in *B. terrestris*, genes showing allele-specific  
66 expression will be enriched for reproductive processes. Additionally, if DNA methylation acts as  
67 an imprinting mark in *B. terrestris* then we predict that some genes will show a direct association  
68 between allele-specific expression and allele-specific methylation.

## 69 **Materials and Methods**

### 70 **Samples and data**

71 The data used in this study were generated in previously published work by Marshall *et al.* (2019).  
72 Briefly, these consist of 18 RNA-Seq libraries generated from head tissue of three reproductive  
73 workers and three sterile workers per colony, with three independent colonies total. DNA from head  
74 tissue from the same individuals was pooled by reproductive status and colony for whole genome  
75 bisulfite sequencing, producing one representative reproductive sample and one sterile sample per  
76 colony replicate, giving six whole genome bisulfite libraries total. One RNA-Seq sample, J8\_24, was  
77 excluded from this study as it was possibly incorrectly labelled in the previous work, see Marshall  
78 *et al.* (2019).

### 79 **Identification of allele-specific expression**

80 Data were quality checked using fastqc v.0.11.5 (Andrews, 2010) and trimmed using CutAdapt v1.1  
81 (Martin, 2011). Trimmed data were aligned to the reference genome (Bter\_1.0, Refseq accession  
82 no. GCF\_000214255.1 (Sadd *et al.*, 2015)) using STAR v2.5.2 (Dobin *et al.*, 2016) with standard  
83 parameters. SNPs were the calling following the GATK best practices for SNP calling from RNA-Seq  
84 data (Auwera, 2014). Briefly this involves assigning read groups and marking duplicate reads using  
85 Picard v.2.6.0 (Broad Institute, 2018), removing reads overlapping introns to keep only exonic reads,  
86 calling SNPs with a minimum confidence score of 20.0, then filtering SNPs by windows of three  
87 within a 35bp region, to keep only those with a Fisher strand value greater than 30.0 and a quality  
88 by depth value greater than 2.0 (these filtering steps are considered particularly stringent) (Auwera,  
89 2014). These SNPs were then incorporated into the WASP v.0.3.1 pipeline (van de Geijn *et al.*,  
90 2015) which re-maps all reads with either the reference SNP or alternative SNP in order to reduce  
91 reference allele mapping bias. Reads that cannot be mapped with the alternative SNP are discarded.

## Allele-specific methylation and expression in bumblebees.

---

92 SNPs were then filtered to keep only biallelic SNPs allowing individual alleles to be identified. Final  
93 reads were then counted per biallelic SNP using the 'ASEReadcounter' program from GATK.

94 A custom R script was used to annotate the SNP positions with gene identifiers, SNPs were  
95 filtered to remove those with a coverage of less than 10. SNPs were also removed if they had a count  
96 of zero for either the alternative or reference SNP as they may have been mis-called by the SNP  
97 caller as heterozygous when they are actually homozygous. Two new columns were then created to  
98 represent each allele, as it is not possible to tell which SNPs belong to which allele (e.g. a reference  
99 SNP at a given position may be accompanied with an alternative SNP on the same allele). The  
100 counts for each SNP were then allocated to either 'allele: 1' or 'allele: 2', with the highest counts  
101 per SNP allocated to 'allele: 1' (Fig.1 and supplementary 2.0 Fig.S1). Counts per SNP per allele  
102 were then summed over each gene for each reproductive status per colony creating one representative  
103 sample per reproductive status per colony. Conducting analyses on a per gene basis decreases false  
104 positive calls of allele-specific expression which may occur if there is some remaining reference  
105 allele mapping bias after re-mapping with WASP (Degner *et al.*, 2009).

106 As this method is naive to allele specific alternative splicing, stringent filtering was applied  
107 throughout. Only genes with counts found in at least two of the three colony replicates per  
108 reproductive caste were tested. A logistic regression model was then applied with the proportion of  
109 allelic expression per gene as the dependent variable and with reproductive status and colony as  
110 independent variables, a quasibinomial distribution was applied to account for any overdispersion  
111 within the data. P-values were corrected for multiple testing using the Benjamini-Hochberg method  
112 (Benjamini and Hochberg, 1995) and genes were classed as showing allele specific expression if the  
113 q-value was <0.05 and the average proportion of allelic expression per caste across colonies was  
114 >0.65. This stringent filtering was used to account for cases of mis-allocation of SNPs to the correct  
115 alleles (Fig.1).

## Allele-specific methylation and expression in bumblebees.

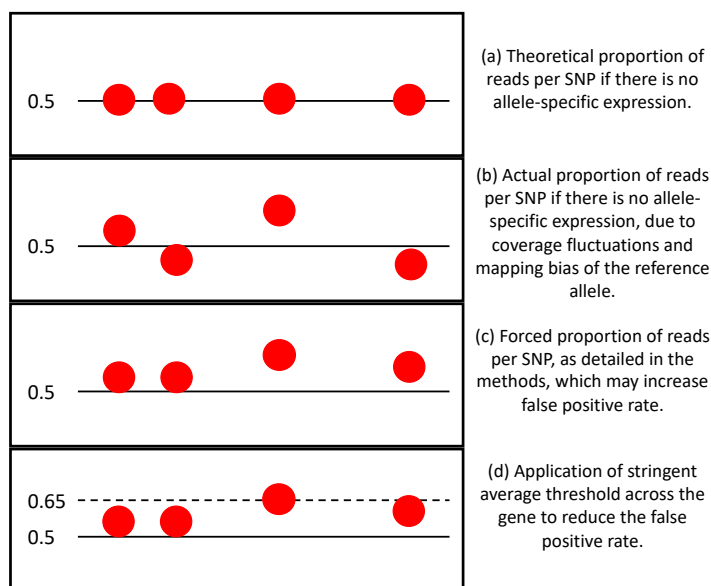

Figure 1: Overview of the theoretical proportions of reads per SNP in a gene which does not show allele-specific expression. Each red dot is an individual SNP.

### 116 Identification of allele-specific methylation

117 Data quality were checked using fastqc v.0.11.5 (Andrews, 2010) and trimmed using CutAdapt v1.1  
118 (Martin, 2011). Trimmed data were aligned to the reference genome (Bter\_1.0, Refseq accession no.  
119 GCF\_000214255.1, (Sadd *et al.*, 2015)) using Bismark v.0.16.1 (Krueger and Andrews, 2011) and  
120 bowtie2 v.2.2.6 (Langmead and Salzberg, 2012) with standard parameters. Alignment output files  
121 were deduplicated using Bismark v.0.16.1 (Krueger and Andrews, 2011) and sorted and indexed  
122 using samtools v.1.3.2 (Li *et al.*, 2009).

123 Allele-specific methylation was determined using a probabilistic model implemented using  
124 the '*amrfinder*' program from the MethPipe package v.3.4.2 (Fang *et al.*, 2012). This program  
125 scans the genome using a sliding window approach and fits two models to each interval, one model  
126 predicts the methylation levels of each window are the same for both alleles and a second model  
127 predicts the methylation levels are different for each allele. The likelihood of the two models is then

## Allele-specific methylation and expression in bumblebees.

---

128 compared and a false discovery rate corrected p-value is generated per window (Fang *et al.*, 2012).  
129 Sample input files were merged by reproductive group in order to increase the coverage per CpG as  
130 this method does not take replication into account. Windows were defined as three CpGs with a  
131 minimum coverage of 10 reads per CpG. Only regions within the main 18 linkage groups of the  
132 *B. terrestris* genome were tested for allele specific methylation as the program is not designed to  
133 cope with the number of unplaced scaffolds (5,591) that the current genome build contains. Finally,  
134 allelically methylated regions falling within a gene were annotated with the gene identifier using a  
135 custom R script.

136 This method of identifying allelically methylated regions is preferable compared to using SNP  
137 data to identify alleles for the data presented here. Firstly, it is difficult to call SNPs reliably from  
138 bisulfite data, this is because C/T SNPs and C/T conversions introduced during bisulfite treatment  
139 appear the same within the data (Liu *et al.*, 2012). Secondly, as the samples used were pooled  
140 females, each sample may contain multiple SNPs at a given loci meaning the coverage produced per  
141 SNP would be too low to produce any reliable estimates of allelic methylation.

### 142 **Gene ontology analysis**

143 Gene ontology terms for *B. terrestris* were taken from a custom database made in Bebane *et al.* (2019).  
144 GO enrichment analysis was carried out using the hypergeometric test with Benjamini-Hochberg  
145 (Benjamini and Hochberg, 1995) multiple-testing correction,  $q < 0.05$ . GO terms from genes showing  
146 allele-specific expression were tested for enrichment against a database made from the GO terms of  
147 all genes identified in the RNA-Seq data. GO terms from genes showing allele-specific methylation  
148 were tested for enrichment against a database made from the GO terms of all genes identified as  
149 methylated. Genes were determined as methylated if they had a mean weighted methylation level  
150 (Schultz *et al.*, 2012) greater than the bisulfite conversion error rate of  $>0.05$ . Descriptions of GO  
151 terms and treemaps were generated by REVIGO (Supek *et al.*, 2011).



## 152 **Relationship between allele-specific expression and allele-specific methylation**

153 Significant overlap between genes showing allele-specific expression and allele-specific methylation  
154 was tested using a hypergeometric test. Overlap plots were generated using the *UpSetR* package in  
155 R (Lex *et al.*, 2016). Custom R scripts were used to test for a relationship between allele-specific  
156 expression and allelically methylated genes and the interaction of that relationship with reproductive  
157 caste.

## 158 **Results**

### 159 **Allele-specific expression**

160 All reads had 13bp trimmed from the start due to base bias generated by the Illumina protocol  
161 (Krueger *et al.*, 2011). The mean number of uniquely mapped reads was  $89.4\% \pm 0.8\%$  (mean  $\pm$   
162 standard deviation). This equated to a mean of  $10,115,366 \pm 1,849,600$  uniquely mapped reads  
163 (supplementary 1.0.0). The average number of heterozygous SNPs called per sample was  $17,753 \pm$   
164  $6,840$ , of which an average of  $9,355 \pm 3,781$  had a coverage greater than 10 and after filtering to  
165 remove potentially homozygous SNPs the average final number of SNPs per sample was  $9,297 \pm$   
166  $3,755$  (supplementary 2.0, Fig.S2a). The average number of genes with at least one SNP per sample  
167 was  $2,436 \pm 947$  (supplementary 2.0, Fig.S2b).

168 Only genes present in at least two colonies per reproductive status were tested for allele-specific  
169 expression, this lead to a final conservative list of 2,673 genes (24.2% of all annotated genes in the  
170 reference genome Bter\_1.0). A total of 139 genes were found to show significant allelic expression  
171 bias ( $q < 0.05$  and average allelic expression proportion  $> 0.65$ ), supplementary 1.0.1 and 2.0, Fig.S3.  
172 As expected there were many genes which show a significant q-value below the cut-off threshold of  
173 0.65 (supplementary 2.0, Fig.S4).

174 The genes of reproductive and sterile workers show similar levels of allelic expression

Allele-specific methylation and expression in bumblebees.

175 (Spearman's rank correlation,  $S = 1229363078$ ,  $\rho = 0.61$ ,  $p < 0.0001$ , Fig.2a). Of the 139 genes  
176 found to show allele-specific expression a significant number are shared between reproductive and  
177 sterile workers (hypergeometric test  $p < 0.0001$ , Fig.2b), with eight found only in sterile workers and  
178 15 found only in reproductive workers ( e.g. Fig.3, supplementary 1.0.1).

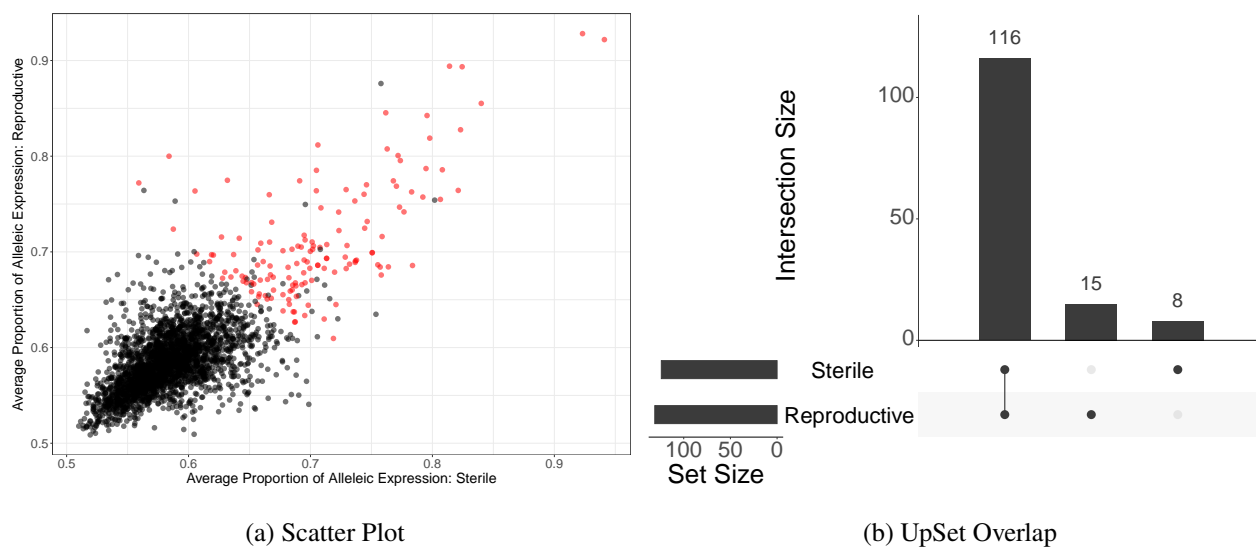

Figure 2: (a) Scatter plot showing the allelic expression proportion of sterile workers plotted against the allelic expression proportion of reproductive workers (allelic expression proportion averaged across colonies). Each point is a gene, the red points indicate genes showing significant allele-specific expression ( $q < 0.05$  and average allelic expression proportion  $> 0.65$ ). (b) An UpSet plot showing the number of allelically expressed genes shared by worker caste and the number unique to reproductive or sterile workers (intersection size), indicated by a joint dot or single dot respectively. The set size shows the total allelically expressed genes in either reproductive or sterile workers.

### Allele-specific methylation and expression in bumblebees.

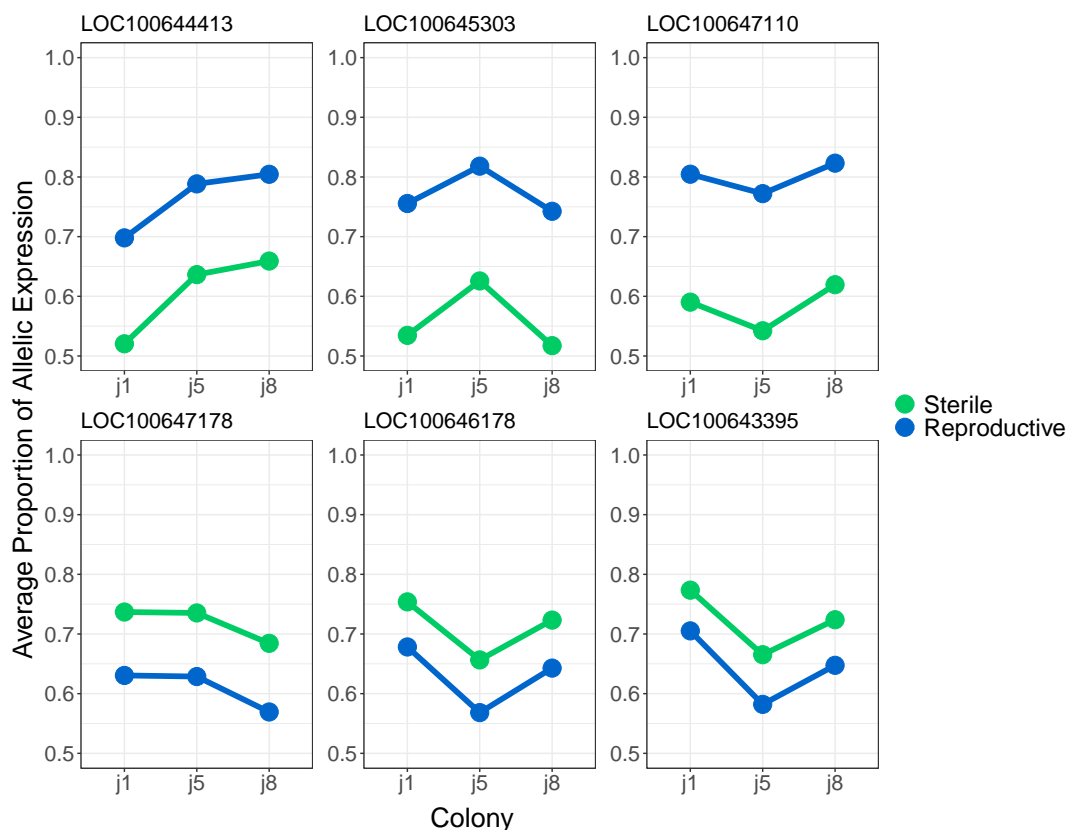

Figure 3: The average proportion of allelic expression for genes found to show significant allele specific expression in only sterile or reproductive workers across colonies. The top row shows the genes with the highest allelic expression bias in reproductive workers compared to sterile workers. The bottom row shows the highest allelic expression bias in sterile workers compared to reproductive workers.

179            There is also some variability in allelic expression proportion between colonies, with  
180 reproductive and sterile workers showing similar levels of bias compared to other colony replicates  
181 (supplementary 2.0 Fig.S5 and Fig.3). However, this is less apparent in the most highly biased genes  
182 (Fig.4).

## Allele-specific methylation and expression in bumblebees.

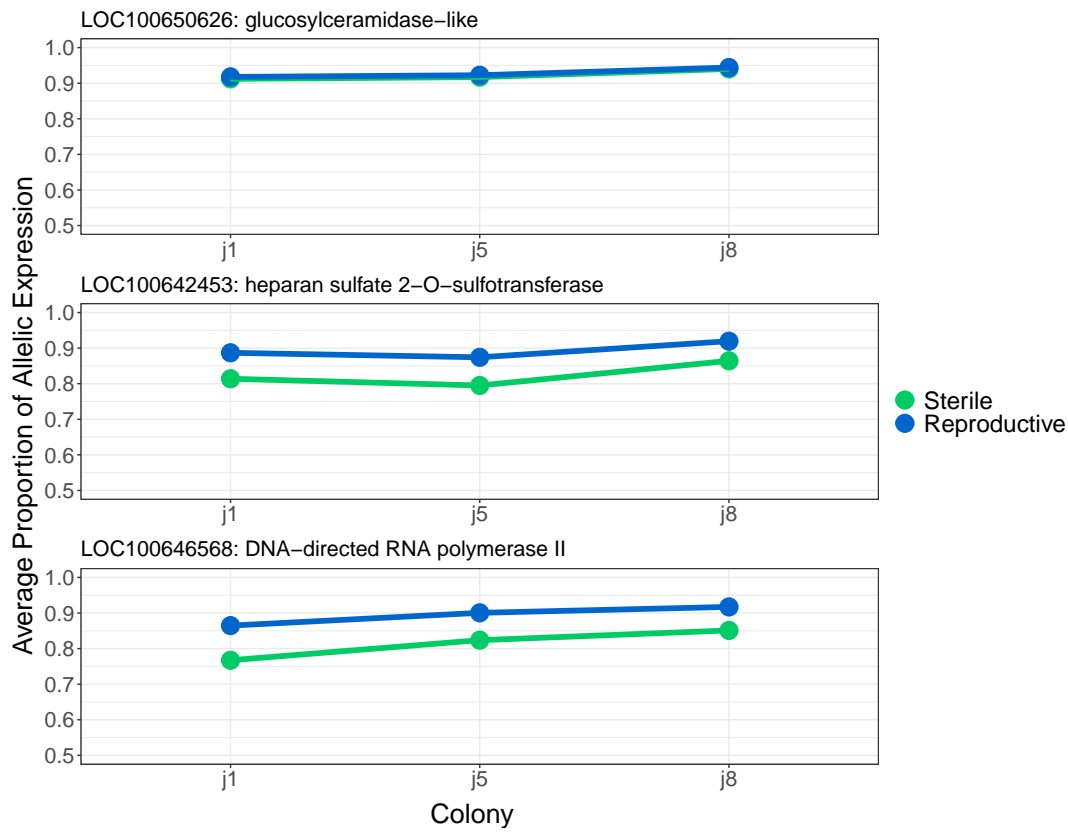

Figure 4: The average proportion of allelic expression for genes found to show the most extreme allele specific expression in both sterile and reproductive workers across colonies.

183 Enriched GO terms associated with genes showing significant allele-specific expression in  
184 both reproductive castes were involved in multiple biological processes, including; "*female gamete*  
185 *generation*" (GO:0007292), "*positive regulation of ovulation*" (GO:0060279) and "*histone H3-K27*  
186 *acetylation*" (GO:0043974), supplementary 1.0.2.

187 GO terms enriched for the eight genes showing allele specific expression in sterile workers  
188 included mostly catabolic processes, but also "*response to pheromone*" (GO:0019236). The  
189 GO terms enriched for the 15 genes showing allele-specific expression in reproductive workers  
190 included; "*primary sex determination*" (GO:0007538) as well as multiple other cellular processes,  
191 supplementary 1.0.2. These results should be interpreted with care as the gene lists are relatively  
192 small. However, it is worth noting that the hypergeometric test used to generate the enriched terms  
193 has been previously shown to be the most appropriate statistic for gene ontology enrichment for

194 small gene lists (Rivals *et al.*, 2007).

## 195 **Allele-specific methylation**

196 Up to a maximum of 10bp were trimmed from the start of all reads due to base bias generated by the  
197 Illumina sequencing protocol (Krueger *et al.*, 2011). The mean mapping efficiency was 63.6%  $\pm$   
198 1.4% (mean  $\pm$  standard deviation) and the mean coverage was 17.7  $\pm$  0.5 reads per base, the average  
199 number of uniquely mapped reads were 27,709,214  $\pm$  753,203 (supplementary 1.0.3). 12.79% of the  
200 genome was not tested for allele-specific methylation as only regions in the main 18 linkage groups  
201 of the *B. terrestris* genome (Bter\_1.0) could be tested.

202 Reproductive workers have significantly more allelically methylated regions compared to  
203 sterile workers, 303 (supplementary 1.0.4) compared to 201 (supplementary 1.0.5) respectively  
204 (Chi-squared goodness of fit; X-squared = 20.643, df = 1, p <0.0001). The majority of these regions  
205 occur within annotated genes, 26 and 15 allelically methylated regions occur outside of a gene for  
206 reproductive and sterile workers.

207 Most allelically methylated genes are unique to either sterile or reproductive workers, however,  
208 there is a significant number of common allelically methylated genes (hypergeometric test p <0.0001,  
209 Fig.5a). Most allelically methylated regions found within genes do not have additional annotation,  
210 however there are more located in exons compared to introns for both reproductive and sterile castes  
211 (Fig.5b).

## Allele-specific methylation and expression in bumblebees.

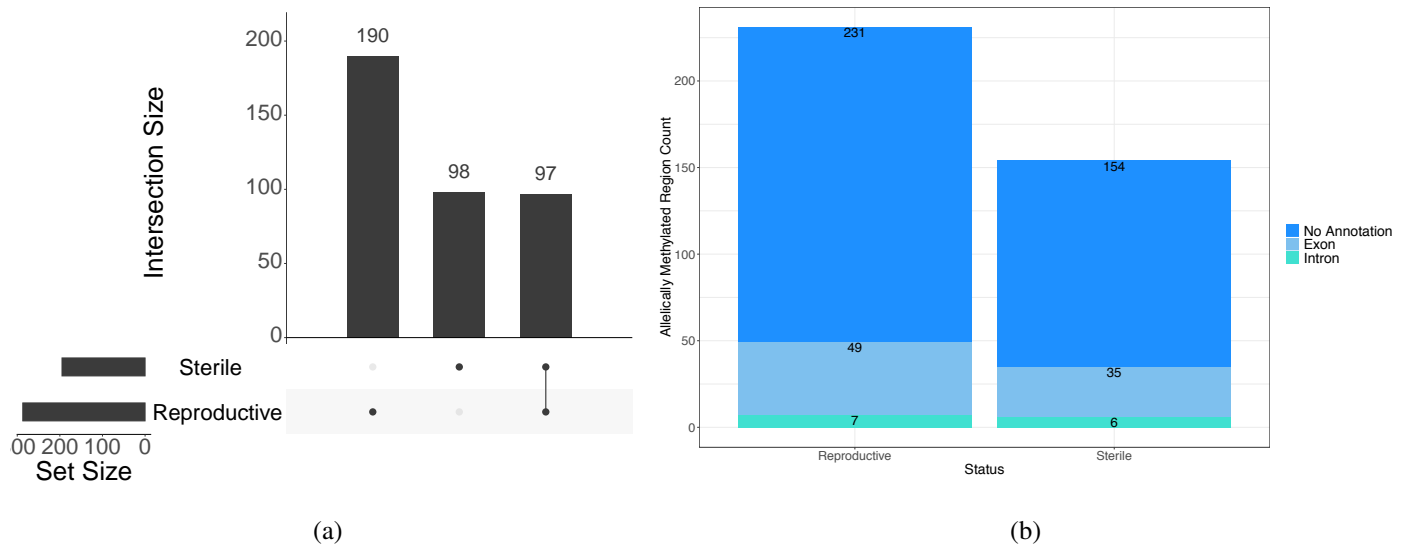

Figure 5: (a) UpSet plot showing the number of genes with allele-specific methylation in just reproductive and sterile workers, as well as the number of genes in common between both reproductive castes. (b) Component bar plot showing the number of allelically methylated regions within genes, found in exons and introns and the number without additional annotation.

212 Enriched GO terms associated with allelically methylated genes in both castes are involved in  
213 a variety of biological processes with many relating to the term "*positive regulation of RNA splicing*"  
214 (GO:0033120). As above, the enriched GO terms associated with allelically methylated genes in just  
215 sterile or reproductive workers are also involved in a large number of biological processes. However,  
216 the terms "*oocyte development*" (GO:0048599), "*ovarian follicle development*" (GO:0001541),  
217 "*oogenesis stage*" (GO:0022605) and other reproductive terms were enriched in allelically methylated  
218 genes of reproductive workers. Additionally none of these terms were identified in the GO terms  
219 associated with the allelically methylated genes of sterile workers (supplementary 1.0.6).

### 220 Relationship of allele-specific expression and methylation

221 There is no significant overlap between genes showing allele-specific expression and allele-specific  
222 methylation (overlap between all conditions; hypergeometric test  $p = 0.209$ , Fig.6). However, six  
223 genes were found to show allele-specific methylation and expression in both reproductive castes, one

## Allele-specific methylation and expression in bumblebees.

224 gene was found to show allele-specific expression in both castes and allele-specific methylation in  
225 reproductive workers and one gene shows allele-specific expression in both castes and allele-specific  
226 methylation in sterile workers (Table 1).

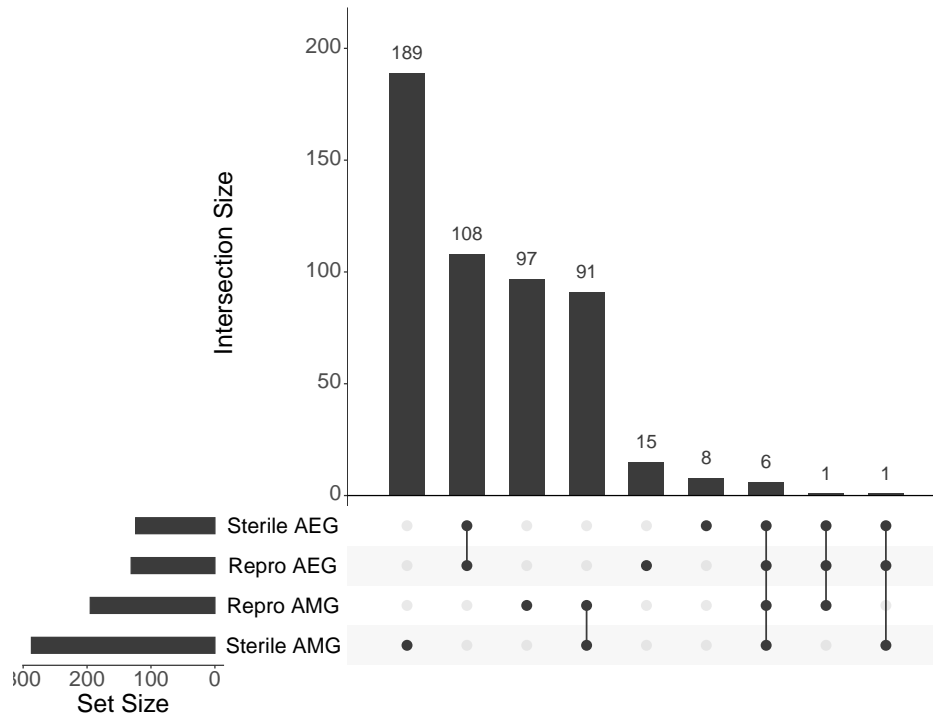

Figure 6: (a) UpSet plot showing the overlapping genes identified as allelically methylated and/or allelically expressed in both castes. AEG stands for allelically expressed gene. AMG stands for allelically methylated gene.

## Allele-specific methylation and expression in bumblebees.

Table 1: Genes identified as showing allele-specific methylation and expression in both reproductive castes. \* this gene does not show allele-specific methylation in sterile workers.  $\diamond$  this gene does not show allele-specific methylation in reproductive workers.

| Gene ID                 | Gene Description                                                            |
|-------------------------|-----------------------------------------------------------------------------|
| LOC100643777            | 40S ribosomal protein S6                                                    |
| LOC100643941            | connectin                                                                   |
| LOC100644811            | neuroligin-4, Y-linked                                                      |
| LOC100652132            | importin-11                                                                 |
| LOC100644932            | AP-1 complex subunit mu-1                                                   |
| LOC105665778            | regulator of microtubule dynamics protein 1-like                            |
| LOC105666711*           | tyrosine-protein kinase Btk29A*                                             |
| LOC100643219 $\diamond$ | putative pre-mRNA-splicing factor ATP-dependent RNA helicase PRP $\diamond$ |

227 The GO terms enriched for the genes found to be allelically methylated and expressed (Table  
228 1) compared to the entire genome as background, included a large variety of biological processes  
229 (supplementary 1.0.7). Specifically some reproductive related terms were enriched; "*female germline*  
230 *ring canal formation*" (GO:0007301) and "*ovarian fusome organization*" (GO:0030723).

231 There is a significant difference in the proportion of allelic expression of genes allelically  
232 methylated in either reproductive workers, sterile workers or both (Kruskal-Wallis; chi-squared =  
233 28.838, df = 2, p < 0.0001). Genes allelically methylated in both castes show on average higher levels  
234 of allele specific expression compared to those unique to either reproductive or sterile workers (Dunn  
235 test with Benjamin-Hochberg correction; both compared to unique in reproductive workers Z = 5.149,  
236 q < 0.0001, both compared to unique in sterile workers Z = 4.147, q < 0.0001), Fig.7. Additionally,  
237 genes with allele-specific methylation unique to reproductive workers show similar levels of allelic  
238 expression compared to genes with allele-specific methylation unique to sterile workers (Dunn test  
239 with Benjamin-Hochberg correction; reproductive compared to sterile Z = -1.851, q = 0.06), Fig.7.  
240 Finally, there is no interaction between reproductive caste and allelic expression proportion on the



Allele-specific methylation and expression in bumblebees.

241 allelic-methylation status of a gene (Anova, interaction vs main effects model,  $F_{2, 296} = 0.1094$ ,  $p =$   
242 0.896), Fig.7.

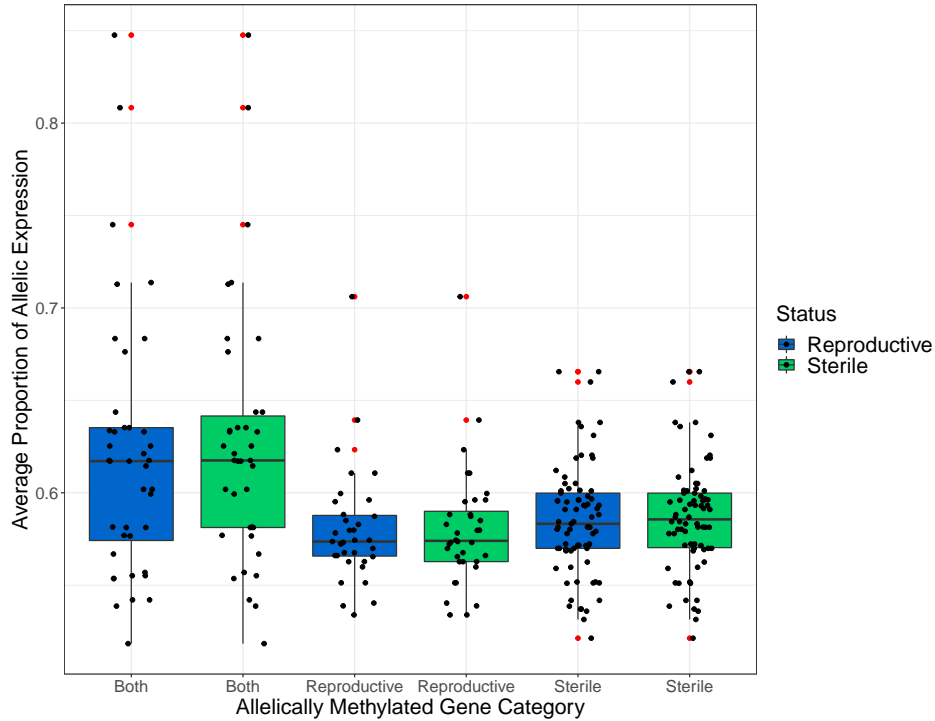

Figure 7: Boxplots showing the proportion of allelic expression in reproductive and sterile workers for genes identified as allelically methylated in either both castes, just reproductive workers or just sterile workers. Each boxplot shows the median along with the 25th and 75th percentile. The whiskers represent 1.5X the interquartile range. Outliers are represented as additional red points and each gene is represented by a black dot.

## 243 Discussion

244 Using whole genome bisulfite sequencing and RNA-seq from reproductive and sterile *B. terrestris*  
245 workers from three independent colonies we have identified genome wide allele-specific expression  
246 and allele-specific methylation. The majority of genes displaying allele-specific expression are  
247 common between reproductive castes and the proportion of allele-specific expression generally varies  
248 between colonies. This study has also identified allele-specific methylation differences between  
249 reproductive castes and found the majority of allelic-methylation events are located within genes.  
250 However, there is no significant overlap of genes showing allele-specific expression and allele-specific  
251 methylation. We have also found that genes with common allele-specific methylation between castes  
252 show a higher proportion of allelic-expression bias compared to allelically methylated genes unique  
253 to either reproductive or sterile workers.

254 This study has identified 139 genes which show allele-specific expression from a stringent  
255 subset of genes covering 24% of all annotated genes within the *B. terrestris* genome. This number is  
256 in line with previous research that identified around 500 loci across the whole genome of *B. terrestris*  
257 (Lonsdale *et al.*, 2017). Predictions based on the kinship theory suggest if imprinted genes exist in  
258 social insects, such as *B. terrestris*, they will be involved in worker reproductive behaviour (Queller,  
259 2003). GO terms enriched for the allelically expressed genes were involved in reproduction amongst  
260 other biological processes. This finding supports the idea that if imprinted genes are present in *B.*  
261 *terrestris* some will be involved in worker reproductive behaviour.

262 The proportion of allelic expression bias differed between colonies and the GO terms enriched  
263 for all allelically expressed genes, whilst containing reproductive terms, were varied. This indicates  
264 allele-specific expression may be involved in other mechanisms, rather than solely imprinting, and that  
265 it plays a diverse role in *B. terrestris*. Previous research identified 61 genes showing allele-specific  
266 expression in a cross of two *Nasonia* species, the expression bias in all genes was attributed to  
267 *cis*-effects (Wang *et al.*, 2016). There have also been a number of non-imprinted loci found in

## Allele-specific methylation and expression in bumblebees.

---

268 humans which show allele-specific expression directly associated with *cis*-acting polymorphic sites,  
269 such a single nucleotide polymorphisms (SNPs) (Tycko, 2010). Given that each colony used here  
270 is genetically distinct, *cis*-effects, such as SNPs, are likely represented in the results. In humans  
271 <1% of genes are imprinted but considerably more exhibit allele-specific expression (Tycko, 2010),  
272 it is therefore reasonable to assume only a small percentage of the genes identified as showing  
273 allele-specific expression in this study may actually be imprinted genes.

274         Whilst the majority of genes showing allele-specific expression were common between  
275 reproductive castes, a large number of genes show allele-specific methylation which is unique to  
276 either reproductive or sterile workers. Additionally, there are significantly more allelically-methylated  
277 sites in reproductive workers compared to sterile workers, with allelically methylated genes in  
278 reproductive workers enriched for GO terms related to reproduction. These findings support previous  
279 research which suggests methylation is associated with worker reproductive behaviour. Amarasinghe  
280 *et al.* (2014) found a global erasure of DNA methylation increased reproductive behaviour, Liu *et al.*  
281 (2018) found differences in expression in genes responsible for methylation between castes and  
282 Marshall *et al.* (2019) found differentially methylated genes between *B. terrestris* castes, some of  
283 which were involved in reproductive processes. Numerous other studies have linked methylation to  
284 caste differences in various other social insect species, such as; *Apis mellifera* (Lyko *et al.*, 2010;  
285 Elango *et al.*, 2009), *Camponotus floridanus* and *Harpegnathos saltator* (Bonasio *et al.*, 2012),  
286 *Polistes dominula* (Weiner *et al.*, 2013) and *Zootermopsis nevadensis* (Glastad *et al.*, 2016). The  
287 development of experimental techniques to alter DNA methylation, such as CRISPR/Cas (Vojta *et al.*,  
288 2016), will allow for experiments to test the causal effect of DNA methylation and allele-specific  
289 methylation on caste determination in social insects.

290         It is, however, clear from this study that DNA methylation does not play a direct causal  
291 role in the production of all allele-specific expression events, with only a small number of genes  
292 displaying both allele-specific expression and methylation. This does not rule out the possibility that  
293 methylation may act as an imprinting mark, if only a small number of genes are actually imprinted,

## Allele-specific methylation and expression in bumblebees.

---

294 as in humans (Tycko, 2010). GO terms enriched for the few genes which do show allele-specific  
295 methylation and allele-specific expression included some reproductive related terms. As the kinship  
296 theory predicts imprinted genes should affect reproduction in *B. terrestris* (Queller, 2003), the  
297 identification of these genes provides the groundwork for future research to further investigate the  
298 possibility of parent-of-origin methylation as an imprinting mark.

299 Additional imprinting marks should not be ruled out however as GO terms enriched for genes  
300 showing allele-specific methylation included histone modifications. Genes displaying allele-specific  
301 methylation may feed into other mechanisms which may, in-turn, drive allele-specific expression,  
302 accounting for the lack of direct association. For example, methylation of an imprinting control region  
303 can signal certain histone modifications which can allow the formation of condensed chromatin,  
304 silencing many genes in one region (Barlow, 2011), this process can also occur in an allele-specific  
305 manner (Tycko, 2010).

306 Whilst only a small number of genes show allele-specific methylation and allele-specific  
307 expression, genes showing allele-specific methylation in both reproductive castes had higher allelic  
308 expression bias compared to those found only in one caste. One explanation is that allelically  
309 methylated genes present in both castes carry out different functions to those identified in a single  
310 caste. This is supported by the diverse GO terms obtained for shared and caste-specific allelically  
311 methylated genes. In humans, the majority of allele-specific methylation is genotype dependent rather  
312 than parentally inherited (Meaburn *et al.*, 2010). Whereas, allele-specific methylation associated with  
313 imprinting may change at different stages of development (Edwards *et al.*, 2017). It may therefore be  
314 that the common allelically methylated genes identified here are linked to genotype (i.e. epialleles)  
315 whereas the caste-specific allelically methylated genes may represent imprinting marks. However,  
316 this is speculation and requires further investigation.

317 In order to further understand the role and origin of allele-specific methylation a pipeline  
318 is needed which integrates SNP data (generated from genomic DNA), to allow the identification  
319 of specific alleles. Using this method rather than the probabilistic models employed here would

## Allele-specific methylation and expression in bumblebees.

---

320 enable hyper/hypomethylation (i.e. higher or lower methylation in one conditions compared to  
321 another) to be associated with allele-specific expression when they occur in tandem. Additionally,  
322 this method, with increased biological replication per colony, would facilitate the identification of  
323 epialleles, i.e. when allele-specific methylation is driven by genotype. Epialleles have been identified  
324 in the honeybee (Wedd *et al.*, 2016) and will be important in the identification of parent-of-origin  
325 methylation (Remnant *et al.*, 2016).

326 Overall, this study provides evidence suggesting imprinted genes exist in *B. terrestris* and are  
327 related to worker reproductive behaviour as predicted by Queller (2003) and Haig (2000). However,  
328 the role of DNA methylation, as a mechanism of potential imprinting, is still unclear. The diverse  
329 function of genes showing allele-specific expression and/or allele-specific methylation suggests a  
330 varied role for these genomic mechanisms and experimental validation of their function is required.  
331 Future research utilising highly related reciprocal crosses, in order to identify the parental origin of  
332 an allele, is needed to discover imprinted genes and to take into account *cis*-effects, such as genotype.  
333 These types of crosses can also be used to further investigate parent-of-origin DNA methylation as a  
334 mechanism of imprinting.

### 335 **Acknowledgements**

336 This research used the ALICE2 High Performance Computing Facility at the University of Leicester.  
337 H.M. was supported by a NERC CENTA DTP studentship. A.R.C.J. and Z.N.L. were supported by  
338 BBSRC MIBTP DTP studentships. This work was supported by the Natural Environment Research  
339 Council [grant number: NE/N010019/1 to E.B.M.]. The authors declare no conflict of interests.

### 340 **Author contributions**

341 E.B.M. conceived the study. H.M. analysed the data. A.R.C.J. and Z.N.L. contributed to the  
342 allele-specific expression analyses. H.M wrote the initial manuscript. All authors contributed to and

---

Allele-specific methylation and expression in bumblebees.

343 reviewed the manuscript.

344 **Data Accessibility**

345 Data has been deposited in GenBank under NCBI BioProject: PRJNA533306. All code is available  
346 at <http://doi.org/10.5281/zenodo.1974852>.

## 347 **References**

- 348 Amarasinghe, H. E., Clayton, C. I., and Mallon, E. B. 2014. Methylation and worker reproduction in  
349 the bumble-bee (*Bombus terrestris*). *Proceedings of the Royal Society B: Biological Sciences*,  
350 281(20132502).
- 351 Amarasinghe, H. E., Toghill, B. J., and Mallon, E. B. 2015. Allele specific expression in worker  
352 reproduction genes in the bumblebee *Bombus terrestris*. *PeerJ*, 3: e1079.
- 353 Andrews, S. 2010. Babraham Bioinformatics - FastQC A Quality Control tool for High Throughput  
354 Sequence Data. <http://www.bioinformatics.babraham.ac.uk/projects/fastqc/>.
- 355 Auwera, G. 2014. The GATK Best Practices for variant calling on RNAseq, in full detail.  
356 [https://gatkforums.broadinstitute.org/gatk/discussion/3892/](https://gatkforums.broadinstitute.org/gatk/discussion/3892/the-gatk-best-practices-for-variant-calling-on-rnaseq-in-full-detail)  
357 *the-gatk-best-practices-for-variant-calling-on-rnaseq-in-full-detail*.
- 358 Barlow, D. P. 2011. Genomic Imprinting: A Mammalian Epigenetic Discovery Model. *Annual*  
359 *Review of Genetics*, 45(1): 379–403.
- 360 Barlow, D. P. and Bartolomei, M. S. 2014. Genomic imprinting in mammals. *Cold Spring Harbor*  
361 *Perspectives in Biology*, 45(4): 427–433.
- 362 Bebane, P. S. A., *et al.* 2019. The effects of the neonicotinoid imidacloprid on gene expression and  
363 DNA methylation in the buff-tailed bumblebee *Bombus terrestris*. *Proc. R. Soc. B*, 286: 20190718.
- 364 Benjamini, Y. and Hochberg, Y. 1995. Controlling the false discovery rate: a practical and powerful  
365 approach to multiple testing. *Journal of the Royal Statistical Society*, 57(1): 289–300.
- 366 Bewick, A. J., Vogel, K. J., Moore, A. J., and Schmitz, R. J. 2016. Evolution of DNA methylation  
367 across insects. *Molecular Biology and Evolution*, 34(3): 654–665.
- 368 Bonasio, R., *et al.* 2012. Genome-wide and caste-specific DNA methylomes of the ants *Camponotus*  
369 *floridanus* and *Harpegnathos saltator*. *Current Biology*, 22(19): 1755–1764.
- 370 Broad Institute 2018. Picard Tools - By Broad Institute. <http://broadinstitute.github.io/picard/>.
- 371 Degner, J. F., *et al.* 2009. Effect of read-mapping biases on detecting allele-specific expression from  
372 RNA-sequencing data. *Bioinformatics*, 25(24): 3207–3212.
- 373 Dobin, A., Gingeras, T. R., and Spring, C. 2016. Mapping RNA-seq Reads with STAR Alexander.  
374 *Current Protocols in Bioinformatics*, (51): 1–11.
- 375 Edwards, J. R., Yarychivska, O., Boulard, M., and Bestor, T. H. 2017. DNA methylation and DNA  
376 methyltransferases. *Epigenetics and Chromatin*, 10(1): 1–10.
- 377 Elango, N., Hunt, B. G., Goodisman, M. a. D., and Yi, S. V. 2009. DNA methylation is widespread and  
378 associated with differential gene expression in castes of the honeybee, *Apis mellifera*. *Proceedings*  
379 *of the National Academy of Sciences of the United States of America*, 106(27): 11206–11211.

Allele-specific methylation and expression in bumblebees.

---

- 380 Fang, F., *et al.* 2012. Genomic landscape of human allele-specific DNA methylation. *Proceedings of*  
381 *the National Academy of Sciences*, 109(19): 7332–7337.
- 382 Galbraith, D. A., *et al.* 2016. Testing the kinship theory of intragenomic conflict in honey bees (*Apis*  
383 *mellifera*). *Proceedings of the National Academy of Sciences*, 113(4): 1020–1025.
- 384 Glastad, K. M., Hunt, B. G., Yi, S. V., and Goodisman, M. a. D. 2014. Epigenetic inheritance and  
385 genome regulation: is DNA methylation linked to ploidy in haplodiploid insects? *Proceedings.*  
386 *Biological sciences / The Royal Society*, 281(1785): 20140411.
- 387 Glastad, K. M., Gokhale, K., Liebig, J., and Goodisman, M. A. D. 2016. The caste- and sex-specific  
388 DNA methylome of the termite *Zootermopsis nevadensis*. *Scientific Reports*, 6(37110).
- 389 Glastad, K. M., Hunt, B. G., and Goodisman, M. A. D. 2018. Epigenetics in Insects: Genome  
390 Regulation and the Generation of Phenotypic Diversity. *Annual Review of Entomology*, 64(1):  
391 185–203.
- 392 Haig, D. 2000. The Kinship Theory of Genomic Imprinting. *Annual Review of Ecology, Evolution,*  
393 *and Systematics*, (31): 9–32.
- 394 Knight, J. C. 2004. Allele-specific gene expression uncovered. *Trends in Genetics*, 20(3): 116–122.
- 395 Kocher, S. D., *et al.* 2015. A Search for Parent-of-Origin Effects on Honey Bee Gene Expression.  
396 *G3*, 5(8): 1657–1662.
- 397 Krueger, F. and Andrews, S. R. 2011. Bismark: A flexible aligner and methylation caller for  
398 Bisulfite-Seq applications. *Bioinformatics*, 27(11): 1571–1572.
- 399 Krueger, F., Andrews, S. R., and Osborne, C. S. 2011. Large scale loss of data in low-diversity  
400 illumina sequencing libraries can be recovered by deferred cluster calling. *PLoS ONE*, 6(1): 4–10.
- 401 Langmead, B. and Salzberg, S. L. 2012. Fast gapped-read alignment with Bowtie 2. *Nat Methods*,  
402 9(4): 357–359.
- 403 Lex, A., Gehlenborg, N., and Strobel, H. 2016. UpSet : Visualization of Intersecting Sets. *Europe*  
404 *PMC Funders Group*, 20(12): 1983–1992.
- 405 Li, H., *et al.* 2009. The Sequence Alignment/Map format and SAMtools. *Bioinformatics*, 25(16):  
406 2078–2079.
- 407 Liu, L., *et al.* 2018. Genetic and epigenetic changes during the invasion of a cosmopolitan species  
408 (*Phragmites australis*). *Ecology and Evolution*, 8(13): 6615–6624.
- 409 Liu, Y., Siegmund, K. D., Laird, P. W., and Berman, B. P. 2012. Bis-SNP: combined DNA  
410 methylation and SNP calling for Bisulfite-seq data. *Genome biology*, 13(7): R61.
- 411 Lonsdale, Z., *et al.* 2017. Allele specific expression and methylation in the bumblebee, *Bombus*  
412 *terrestris*. *PeerJ*, 5: e3798.



Allele-specific methylation and expression in bumblebees.

---

- 413 Lyko, F., *et al.* 2010. The honey bee epigenomes: Differential methylation of brain DNA in queens  
414 and workers. *PLoS Biology*, 8(11): e1000506.
- 415 Marshall, H., Lonsdale, Z. N., and Mallon, E. B. 2019. Methylation and gene expression differences  
416 between reproductive and sterile bumblebee workers. *Evolution Letters*, 3: 485–499.
- 417 Marshall, H., *et al.* 2020. Genome-wide search for parent-of-origin allele specific expression in  
418 *Bombus terrestris*. *bioRxiv*, <https://doi.org/10.1101/2020.01.17.909168>.
- 419 Martin, M. 2011. Cutadapt removes adapter sequences from high-throughput sequencing reads.  
420 *EMBnet.journal*, 17(1): 10.
- 421 Meaburn, E. L., Schalkwyk, L. C., and Mill, J. 2010. Allele-specific methylation in the human  
422 genome: Implications for genetic studies of complex disease. *Epigenetics*, 5(7): 578–582.
- 423 Patalano, S., *et al.* 2015. Molecular signatures of plastic phenotypes in two eusocial insect species  
424 with simple societies. *Proceedings of the National Academy of Sciences*, 112(45): 13970–13975.
- 425 Queller, D. C. 2003. Theory of genomic imprinting conflict in social insects. *BMC Evolutionary  
426 Biology*, 3(15).
- 427 Remnant, E. J., *et al.* 2016. Parent-of-origin effects on genome-wide DNA methylation in the Cape  
428 honey bee (*Apis mellifera capensis*) may be confounded by allele-specific methylation. *BMC  
429 genomics*, 17(1): 226.
- 430 Rivals, I., Personnaz, L., Taing, L., and Potier, M. C. 2007. Enrichment or depletion of a GO category  
431 within a class of genes: Which test? *Bioinformatics*, 23(4): 401–407.
- 432 Sadd, B. M., *et al.* 2015. The genomes of two key bumblebee species with primitive eusocial  
433 organization. *Genome Biology*, 16(1): 76.
- 434 Schultz, M. D., Schmitz, R. J., and Ecker, J. R. 2012. ‘Leveling’ the playing field for analyses of  
435 single-base resolution DNA methylomes. *Trends in Genetics*, 28(12): 583–585.
- 436 Standage, D. S., *et al.* 2016. Genome, transcriptome, and methylome sequencing of a primitively  
437 eusocial wasp reveal a greatly reduced DNA methylation system in a social insect. *Molecular  
438 Ecology*, 25(8): 1769–1784.
- 439 Supek, F., Bošnjak, M., Škunca, N., and Šmuc, T. 2011. Revigo summarizes and visualizes long  
440 lists of gene ontology terms. *PLoS ONE*, 6(7).
- 441 Tycko, B. 2010. Allele-specific DNA methylation: Beyond imprinting. *Human Molecular Genetics*,  
442 19(R2): 210–220.
- 443 van de Geijn, B., McVicker, G., Gilad, Y., and Pritchard, J. K. 2015. WASP: allele-specific software  
444 for robust molecular quantitative trait locus discovery. *Nature Methods*, 12(11): 1061–1063.

Allele-specific methylation and expression in bumblebees.

---

- 445 Vojta, A., *et al.* 2016. Repurposing the CRISPR-Cas9 system for targeted DNA methylation. *Nucleic*  
446 *Acids Research*, 44(12): 5615–5628.
- 447 Wang, X., Werren, J. H., and Clark, A. G. 2016. Allele-Specific Transcriptome and Methylation  
448 Analysis Reveals Stable Inheritance and Cis-Regulation of DNA Methylation in *Nasonia*. *PLOS*  
449 *Biology*, 14(7): e1002500.
- 450 Wedd, L., Kucharski, R., and Maleszka, R. 2016. Differentially methylated obligatory epialleles  
451 modulate context-dependent LAM gene expression in the honeybee *Apis mellifera*. *Epigenetics*,  
452 11(1): 1–10.
- 453 Weiner, S. A., *et al.* 2013. A survey of DNA methylation across social insect species, life  
454 stages, and castes reveals abundant and caste-associated methylation in a primitively social wasp.  
455 *Naturwissenschaften*, 100(8): 795–799.
